# Supplementary material
Source: PubMed Central journal article supplement (PMC10513744)

Supplemental Table 1. Characteristics of Children Aged 6–12 Years in Hair Metals Analyses by Inclusion Status, C8 Health Project Neurobehavioral Follow-up Study, Mid-Ohio Valley, 2009–2010 (n = 322)

| Characteristic                                       | Included |                |                    | Excluded |                |                    | p-value |
|------------------------------------------------------|----------|----------------|--------------------|----------|----------------|--------------------|---------|
|                                                      | N        | Percent (Mean) | Standard Deviation | N        | Percent (Mean) | Standard Deviation |         |
| Full Population                                      | 222      | 68.9           |                    | 100      | 31.1           |                    |         |
| Child age, years                                     | 222      | 9.8            | 1.7                | 100      | 9.9            | 1.8                | 0.95    |
| Child sex                                            |          |                |                    |          |                |                    |         |
| Male                                                 | 53       | 23.9           |                    | 96       | 96.0           |                    | <.001   |
| Female                                               | 169      | 76.1           |                    | 4        | 4.0            |                    |         |
| Secondhand smoke age 0–2 years                       |          |                |                    |          |                |                    |         |
| Yes                                                  | 41       | 18.0           |                    | 14       | 14.0           |                    | 0.32    |
| No                                                   | 181      | 82.0           |                    | 86       | 86.0           |                    |         |
| HOME score, maternal section                         |          |                |                    |          |                |                    |         |
| Cognitive scale                                      | 222      | 6.9            | 1.7                | 100      | 6.5            | 2.0                | 0.08    |
| Emotional scale                                      | 222      | 9.8            | 1.5                | 100      | 9.7            | 1.5                | 0.65    |
| Maternal age, years                                  | 221      | 38.6           | 6.0                | 100      | 37.7           | 5.5                | 0.17    |
| Maternal Full Scale IQ (M100, SD 15) ▲               | 221      | 99.4           | 12.6               | 100      | 98.8           | 11.9               | 0.67    |
| Maternal education                                   |          |                |                    |          |                |                    |         |
| Less than high school                                | 10       | 4.5            |                    | 1        | 1.0            |                    | 0.03    |
| High school graduate                                 | 64       | 28.8           |                    | 38       | 38.0           |                    |         |
| Some college                                         | 87       | 39.2           |                    | 45       | 45.0           |                    |         |
| College graduate                                     | 61       | 27.5           |                    | 16       | 16.0           |                    |         |
| Child Neuropsychological Measures                    |          |                |                    |          |                |                    |         |
| WASI (M100, SD 15) ▲                                 |          |                |                    |          |                |                    |         |
| Full Scale IQ                                        | 220      | 101.9          | 12.9               | 100      | 99.3           | 13.5               | 0.11    |
| Verbal IQ                                            | 221      | 103.2          | 13.1               | 100      | 101.0          | 14.3               | 0.12    |
| Performance IQ                                       | 220      | 99.5           | 13.0               | 100      | 97.7           | 13.9               | 0.29    |
| WIAT (M100, SD 15) ▲                                 |          |                |                    |          |                |                    |         |
| Word Reading/Pseudoword Decoding standard score mean | 212      | 102.4          | 11.1               | 93       | 100.8          | 11.9               | 0.27    |
| Numerical Operations standard score                  | 221      | 97.8           | 14.3               | 100      | 97.0           | 16.7               | 0.71    |
| NEPSY (M 10, SD 3) ▲                                 |          |                |                    |          |                |                    |         |
| Comprehension of Instructions scaled score           | 221      | 10.5           | 2.9                | 99       | 10.8           | 2.7                | 0.33    |
| Design Copying Total scaled score                    | 209      | 8.6            | 3.4                | 94       | 7.6            | 3.3                | 0.02    |
| Narrative Memory Free and Cued Recall scaled score   | 221      | 9.3            | 2.9                | 98       | 9.7            | 2.7                | 0.27    |
| Semantic/Initial Letter scaled score mean            | 209      | 9.7            | 2.5                | 90       | 9.1            | 2.6                | 0.09    |
| CPT (M 50, SD 10) ▼                                  |          |                |                    |          |                |                    |         |
| Clinical Confidence Index                            | 215      | 47.8           | 23.5               | 90       | 58.7           | 22.2               | <.001   |

| Characteristic                         | Included |                |                    | Excluded |                |                    | p-value |
|----------------------------------------|----------|----------------|--------------------|----------|----------------|--------------------|---------|
|                                        | N        | Percent (Mean) | Standard Deviation | N        | Percent (Mean) | Standard Deviation |         |
| Omissions T-score                      | 215      | 53.6           | 12.3               | 90       | 53.8           | 12.4               | 0.87    |
| Commissions T-score                    | 215      | 56.3           | 8.2                | 90       | 54.9           | 9.2                | 0.23    |
| Hit Reaction Time T-score              | 215      | 47.5           | 11.0               | 90       | 49.0           | 9.4                | 0.23    |
| CADS, mother report (M 50, SD 10) ▼    |          |                |                    |          |                |                    |         |
| ADHD Index                             | 221      | 54.1           | 11.6               | 100      | 53.4           | 11.0               | 0.59    |
| Combined Type                          | 221      | 53.9           | 10.6               | 100      | 53.7           | 10.6               | 0.85    |
| Inattentive Type                       | 221      | 52.3           | 10.7               | 100      | 50.9           | 9.9                | 0.25    |
| Hyperactive-Impulsive Type             | 221      | 55.3           | 10.7               | 100      | 56.9           | 11.4               | 0.30    |
| CADS, teacher report (M 50, SD 10) ▼   |          |                |                    |          |                |                    |         |
| ADHD Index                             | 134      | 53.5           | 12.1               | 54       | 54.6           | 14.3               | 0.62    |
| Combined Type                          | 134      | 51.9           | 11.5               | 54       | 51.8           | 12.2               | 0.95    |
| Inattentive Type                       | 134      | 48.2           | 9.2                | 54       | 51.1           | 12.9               | 0.14    |
| Hyperactive-Impulsive Type             | 134      | 51.7           | 11.5               | 54       | 51.1           | 10.7               | 0.77    |
| BRIEF, mother report (M 50, SD 10) ▼   |          |                |                    |          |                |                    |         |
| Global Executive Composite             | 219      | 50.5           | 11.3               | 100      | 51.5           | 11.3               | 0.47    |
| Behavioral Regulation Index            | 220      | 49.6           | 10.9               | 100      | 51.8           | 11.3               | 0.10    |
| Metacognition Index                    | 219      | 50.9           | 11.3               | 100      | 51.1           | 11.0               | 0.90    |
| BRIEF, teacher report (M 50, SD 10) ▼  |          |                |                    |          |                |                    |         |
| Global Executive Composite             | 134      | 56.2           | 14.2               | 55       | 58.3           | 14.8               | 0.37    |
| Behavioral Regulation Index            | 134      | 54.0           | 13.3               | 55       | 56.8           | 14.7               | 0.22    |
| Metacognition Index                    | 134      | 56.7           | 14.7               | 55       | 58.2           | 14.3               | 0.50    |
| BASC-2, mother report (M 50, SD 10) ▼  |          |                |                    |          |                |                    |         |
| Behavioral Symptom Index               | 214      | 50.2           | 10.2               | 100      | 51.1           | 9.7                | 0.44    |
| Adaptive Skills (▲)                    | 214      | 50.5           | 10.0               | 100      | 49.4           | 9.9                | 0.35    |
| Internalizing Problems                 | 214      | 52.3           | 11.8               | 100      | 54.6           | 12.0               | 0.12    |
| Externalizing Problems                 | 214      | 50.3           | 9.4                | 100      | 50.8           | 8.7                | 0.63    |
| BASC-2, teacher report (M 50, SD 10) ▼ |          |                |                    |          |                |                    |         |
| Behavioral Symptom Index               | 104      | 48.9           | 8.8                | 36       | 49.7           | 11.0               | 0.94    |
| Adaptive Skills (▲)                    | 104      | 51.9           | 9.9                | 36       | 52.3           | 10.8               | 0.56    |
| Internalizing Problems                 | 104      | 51.3           | 11.2               | 36       | 51.3           | 13.4               | 0.55    |
| Externalizing Problems                 | 104      | 47.8           | 7.2                | 36       | 49.4           | 10.5               | 0.61    |

M, mean; SD standard deviation

▲ higher score reflects better/more favorable performance

▼ lower score reflects better/more favorable performance

Supplemental Table 2. Imputed Variables for Children Aged 6–12 Years with Hair Metals Measurements, C8 Health Project Neurobehavioral Follow-up Study, Mid-Ohio Valley, 2009–2010 (n = 222)

| Variable                                             | Imputed (N) | Percent |
|------------------------------------------------------|-------------|---------|
| Hair Arsenic                                         | 8           | 3.6     |
| Hair Cadmium                                         | 2           | 0.9     |
| Hair Lead                                            | 1           | 0.5     |
| Maternal Age                                         | 1           | 0.5     |
| Maternal Full Scale IQ (M100, SD 15)                 | 1           | 0.5     |
| Examiner                                             | 1           | 0.5     |
| Child Neuropsychological Measures                    |             |         |
| WASI                                                 |             |         |
| Full Scale IQ                                        | 2           | 0.9     |
| Verbal IQ                                            | 1           | 0.5     |
| Performance IQ                                       | 2           | 0.9     |
| WIAT                                                 |             |         |
| Word Reading/Pseudoword Decoding standard score mean | 10          | 4.5     |
| Numerical Operations standard score                  | 1           | 0.5     |
| NEPSY                                                |             |         |
| Comprehension of Instructions scaled score           | 1           | 0.5     |
| Design Copying Total scaled score                    | 13          | 5.9     |
| Narrative Memory Free and Cued Recall scaled score   | 1           | 0.5     |
| Semantic/Initial Letter scaled score mean            | 13          | 5.9     |
| CPT                                                  |             |         |
| Clinical Confidence Index                            | 7           | 3.2     |
| Omissions T-score                                    | 7           | 3.2     |
| Commissions T-score                                  | 7           | 3.2     |
| Hit Reaction Time T-score                            | 7           | 3.2     |
| CADS, mother report                                  |             |         |
| ADHD Index                                           | 1           | 0.5     |
| Combined Type                                        | 1           | 0.5     |
| Inattentive Type                                     | 1           | 0.5     |
| Hyperactive-Impulsive Type                           | 1           | 0.5     |
| BRIEF, mother report                                 |             |         |
| Global Executive Composite                           | 3           | 1.4     |
| Behavioral Regulation Index                          | 2           | 0.9     |
| Metacognition Index                                  | 3           | 1.4     |
| BASC-2, mother report                                |             |         |
| Behavioral Symptom Index                             | 8           | 3.6     |
| Adaptive Skills                                      | 8           | 3.6     |
| Internalizing Problems                               | 8           | 3.6     |
| Externalizing Problems                               | 8           | 3.6     |

Supplemental Table 3. Estimated \*Adjusted Change ( $\psi$ ; 95% confidence interval) in Neuropsychological Measure per Decile Increase in All Hair Metals, Children Aged 6 to 12 Years, C8 Health Project Neurobehavioral Follow-up Study, Mid-Ohio Valley, 2009–2010 (n = 222). Effect estimates from Quantile G-Computation are interpreted as the change in outcome per decile increase in all metals (arsenic, cadmium, manganese, lead).

| Measure                                              | *Adjusted Pooled Psi ( $\psi$ ) | 95% CI       |
|------------------------------------------------------|---------------------------------|--------------|
| WASI (M 100, SD 15) ▲                                |                                 |              |
| Full Scale IQ                                        | -1.01                           | -1.88, -0.15 |
| Verbal IQ                                            | -1.11                           | -1.97, -0.25 |
| Performance IQ                                       | -0.48                           | -1.35, 0.39  |
| WIAT (M 100, SD 15) ▲                                |                                 |              |
| Word Reading/Pseudoword Decoding standard score mean | -0.64                           | -1.39, 0.11  |
| Numerical Operations standard score                  | -0.91                           | -1.92, 0.09  |
| NEPSY (M 10, SD 3) ▲                                 |                                 |              |
| Comprehension of Instructions scaled score           | -0.06                           | -0.27, 0.14  |
| Design Copying Total scaled score                    | -0.12                           | -0.38, 0.13  |
| Narrative Memory Free and Cued Recall scaled score   | -0.06                           | -0.27, 0.15  |
| Semantic/Initial Letter scaled score mean            | -0.08                           | -0.25, 0.10  |
| CPT (M 50, SD 10) ▼                                  |                                 |              |
| Clinical Confidence Index                            | 0.28                            | -1.35, 1.90  |
| Omissions T-score                                    | 0.35                            | -0.54, 1.23  |
| Commissions T-score                                  | 0.22                            | -0.40, 0.85  |
| Hit Reaction Time T-score                            |                                 |              |
| CADS, mother report (M 50, SD 10) ▼                  |                                 |              |
| ADHD Index                                           | 0.70                            | -0.15, 1.55  |
| Combined Type                                        | 0.80                            | 0.04, 1.57   |
| Inattentive Type                                     | 0.90                            | 0.12, 1.68   |
| Hyperactive-Impulsive Type                           | 0.56                            | -0.21, 1.33  |
| CADS, teacher report (M 50, SD 10) ▼                 |                                 |              |
| ADHD Index                                           | 0.15                            | -0.95, 1.25  |
| Combined Type                                        | 0.19                            | -0.89, 1.27  |
| Inattentive Type                                     | 0.32                            | -0.51, 1.15  |
| Hyperactive-Impulsive Type                           | -0.16                           | -1.26, 0.94  |
| BRIEF, mother report (M 50, SD 10) ▼                 |                                 |              |
| Global Executive Composite                           | 0.78                            | -0.02, 1.58  |
| Behavioral Regulation Index                          | 0.56                            | -0.20, 1.33  |
| Metacognition Index                                  | 0.83                            | 0.01, 1.65   |
| BRIEF, teacher report (M 50, SD 10) ▼                |                                 |              |
| Global Executive Composite                           | 0.54                            | -0.77, 1.84  |
| Behavioral Regulation Index                          | 0.39                            | -0.86, 1.63  |
| Metacognition Index                                  | 0.61                            | -0.73, 1.94  |
| BASC-2, mother report (M 50, SD 10) ▼                |                                 |              |
| Behavioral Symptom Index                             | 0.53                            | -0.2, 1.25   |
| Adaptive Skills (▲)                                  | -0.52                           | -1.22, 0.19  |

| Measure                                | *Adjusted Pooled Psi ( $\psi$ ) | 95% CI      |
|----------------------------------------|---------------------------------|-------------|
| Internalizing Problems                 | 0.26                            | -0.58, 1.11 |
| Externalizing Problems                 | 0.63                            | -0.05, 1.31 |
| BASC-2, teacher report (M 50, SD 10) ▼ |                                 |             |
| Behavioral Symptom Index               | 0.83                            | -0.16, 1.82 |
| Adaptive Skills (▲)                    | -0.77                           | -1.91, 0.37 |
| Internalizing Problems                 | 0.86                            | -0.47, 2.19 |
| Externalizing Problems                 | 0.13                            | -0.7, 0.96  |

\*Adjusted for child age, sex, secondhand smoke exposure from birth to 2 years of age, HOME score (cognitive and emotional), maternal education, maternal IQ, and child examiner (WASI, WIAT, NEPSY, CPT).

CI, confidence Interval; M, mean; SD standard deviation

▲ higher score reflects better/more favorable performance

▼ lower score reflects better/more favorable performance

Supplemental Figure 1. Enrollment Scheme, Children Aged 6–12 Years with Hair Metals Measurements, C8 Health Project Neurobehavioral Follow-up Study, Mid-Ohio Valley, 2009–2010 (n = 222)

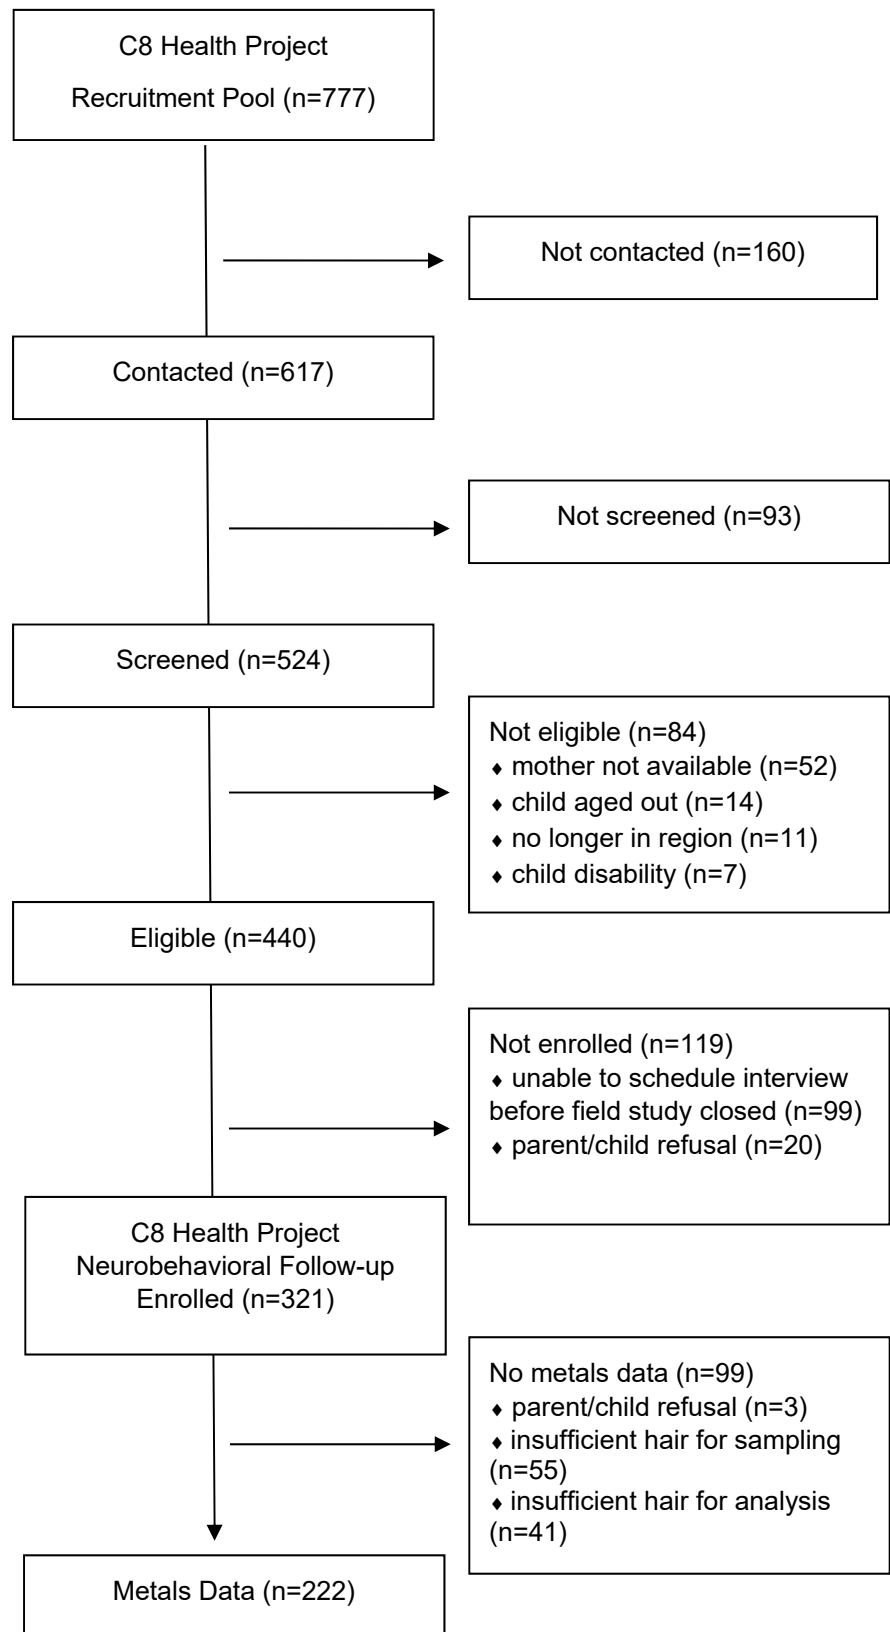

Supplemental Figure 2. Spearman's Rank Correlations of Hair Metal Concentrations ( $\mu\text{g/g}$ ) Among Children Ages 6–12 Years, C8 Health Project Neurobehavioral Follow-up Study, Mid-Ohio Valley, 2009–2010 (n = 222)

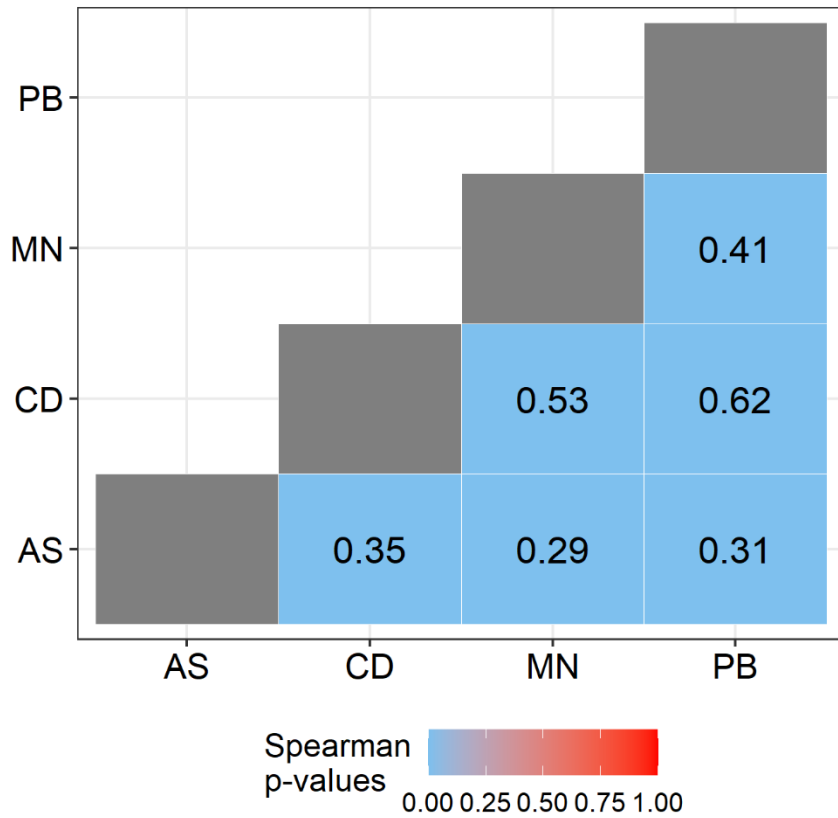

Supplemental Figure 3. Estimated adjusted change (standard deviation; 95% confidence interval; y-axis) when all components of hair metal mixture are at a given percentile (x-axis) compared to all components at the 25<sup>th</sup> percentile. Children aged 6–12 years, C8 Health Project Neurobehavioral Follow-up Study, Mid-Ohio Valley, 2009–2010 (n = 222). Effect estimates from Bayesian Kernel Machine Regression models adjusted for child age, sex, secondhand smoke exposure from birth to 2 years of age, HOME score (cognitive and emotional), maternal education, maternal IQ, and child examiner (WASI, WIAT, NEPSY, CPT). Plots range from 25<sup>th</sup> to 75<sup>th</sup> percentile, in increments of 5 percent.

### WASI Subtests

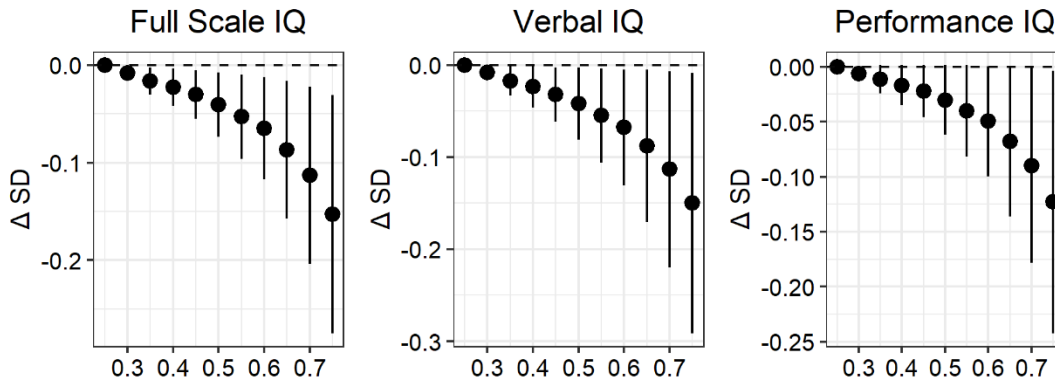

### WIAT Subtests

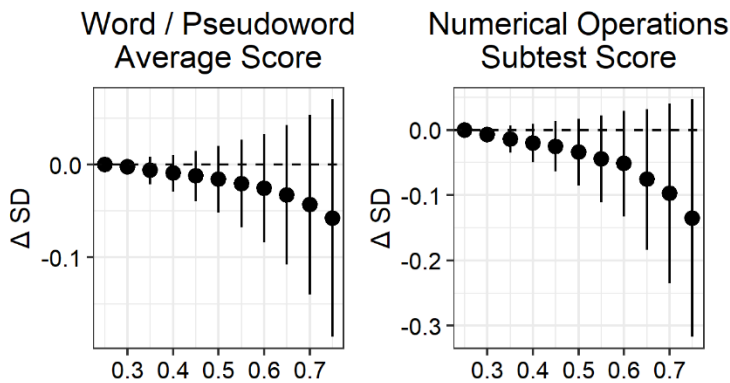

### NEPSY Subtests

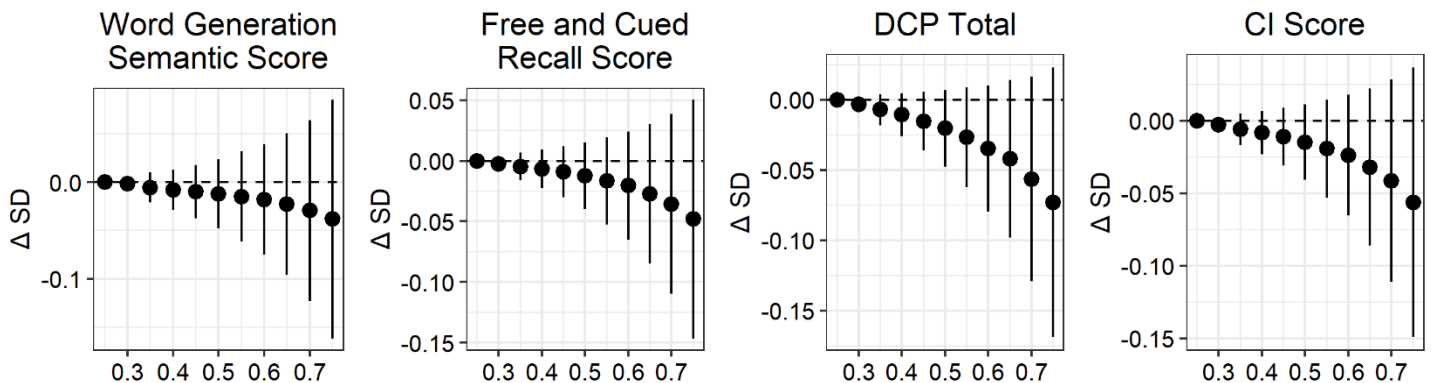

### Exposure Quantiles



### CPTII Subtests

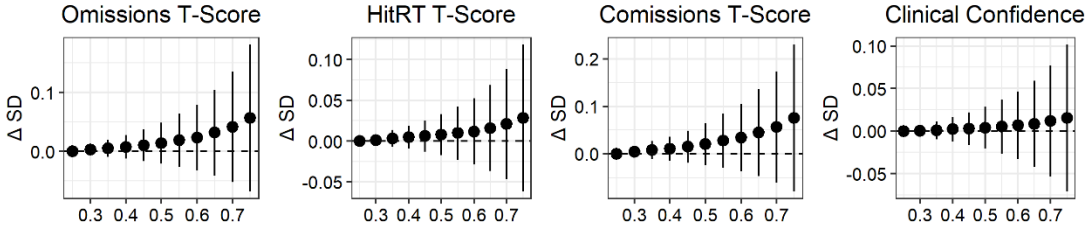

### Parent CADS Subtests

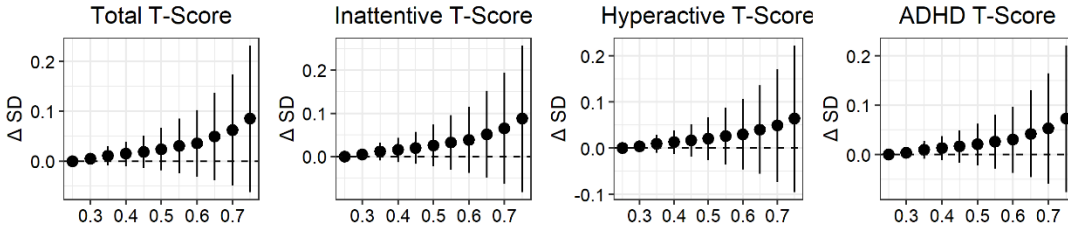

### Teacher CADS Subtests

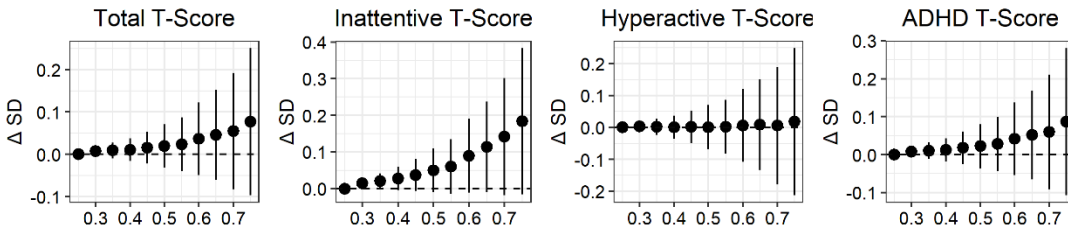

### Parent BRIEF Subtests

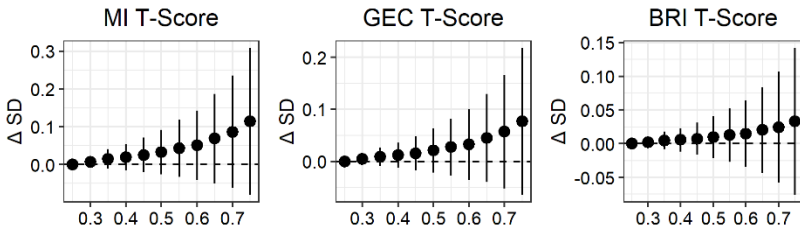

### Teacher BRIEF Subtests

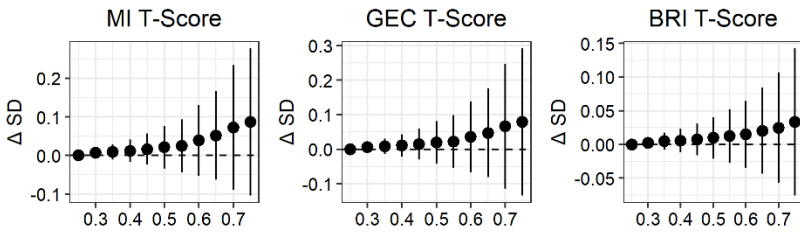

### Parent BASC2 Subtests

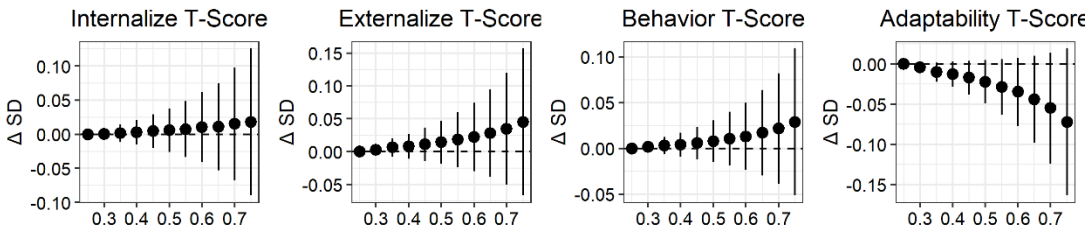

### Teacher BASC2 Subtests

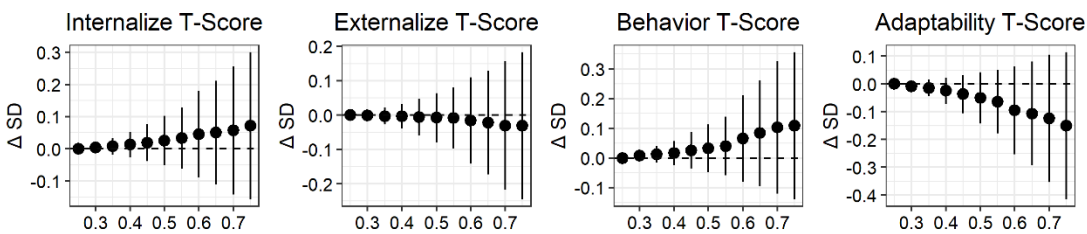

Exposure Quantiles

Supplemental Figure 4. Estimated adjusted change ( $\psi$ ; 95% confidence interval) in neuropsychological measure per decile increase in all hair metals by child sex. Children aged 6–12 years, C8 Health Project Neurobehavioral Follow-up Study, Mid-Ohio Valley, 2009–2010 (n = 222). Effect estimates from Quantile G-Computation are interpreted as change in outcome per decile increase in all metals (arsenic, cadmium, manganese, lead), adjusted for child age, sex, metal mixture\*sex, secondhand smoke exposure from birth to 2 years of age, HOME score (cognitive and emotional), maternal education, maternal IQ, and child examiner (WASI, WIAT, NEPSY, CPT).

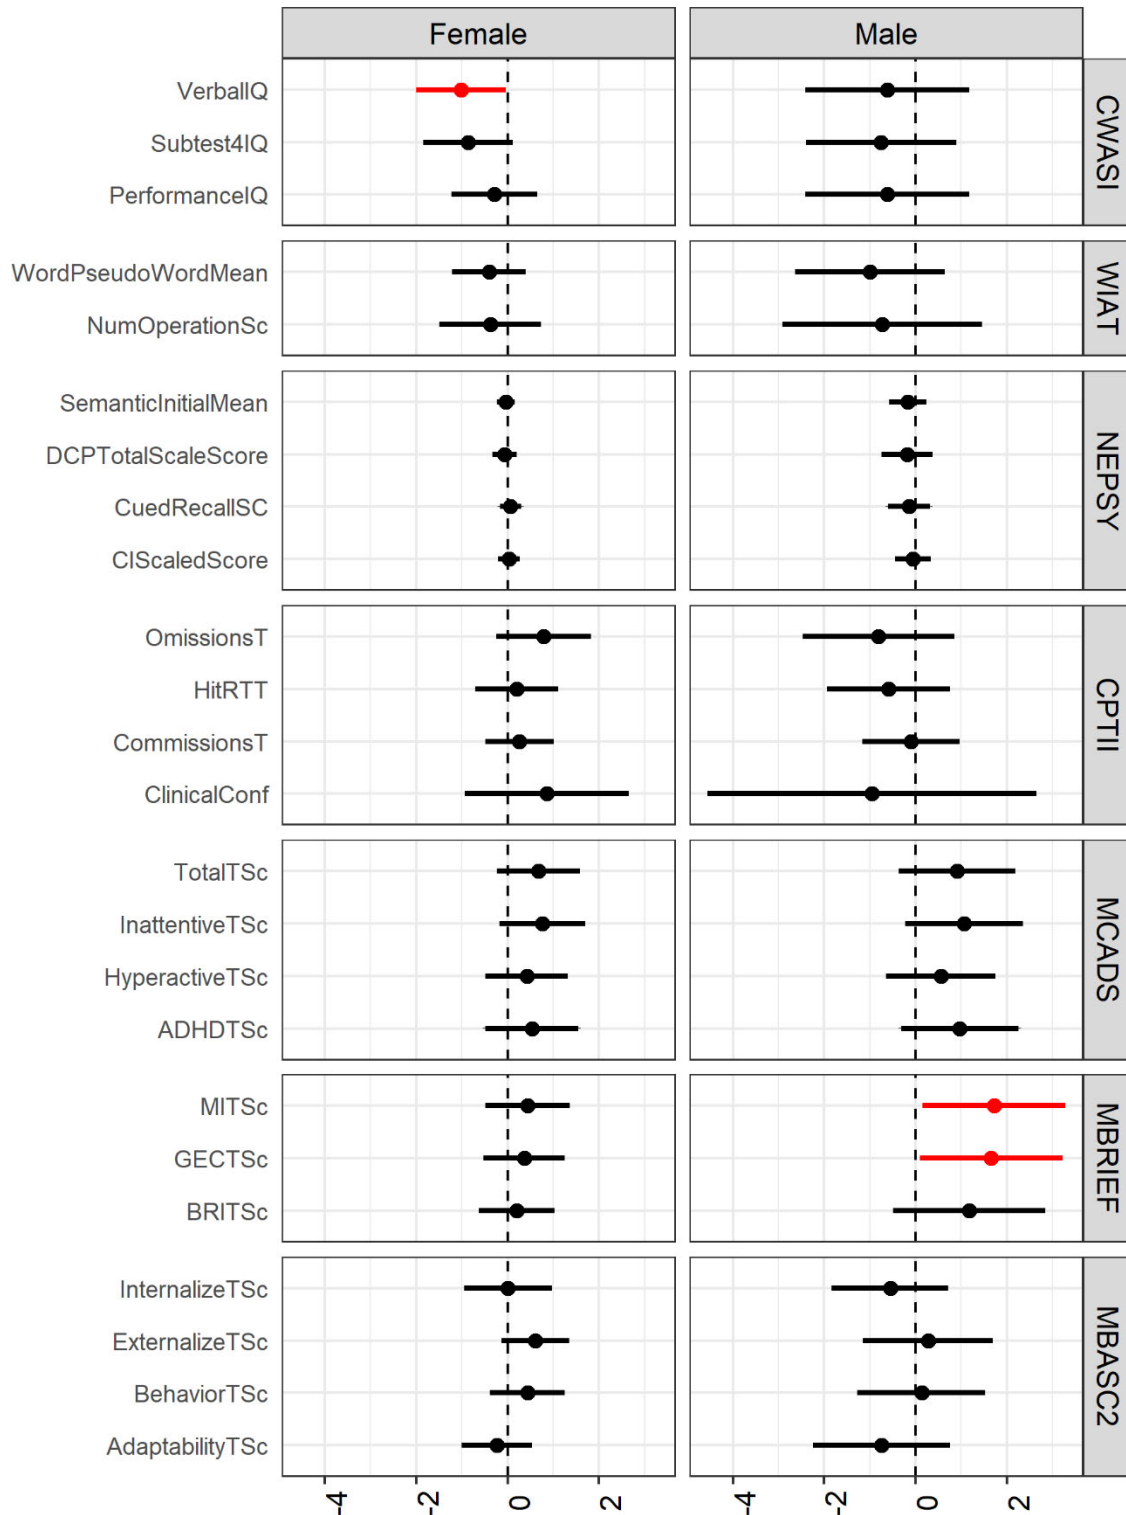

Supplemental Figure 5. Estimated adjusted change ( $\beta$ ; 95% confidence interval) in neuropsychological measure per doubling of individual metal concentration. Children aged 6–12 years, C8 Health Project Neurobehavioral Follow-up Study, Mid-Ohio Valley, 2009–2010 (n = 222). Effect estimates from linear regression models adjusted for child age, sex, secondhand smoke exposure from birth to 2 years of age, HOME score (cognitive and emotional), maternal education, maternal IQ, and child examiner (WASI, WIAT, NEPSY, CPT).

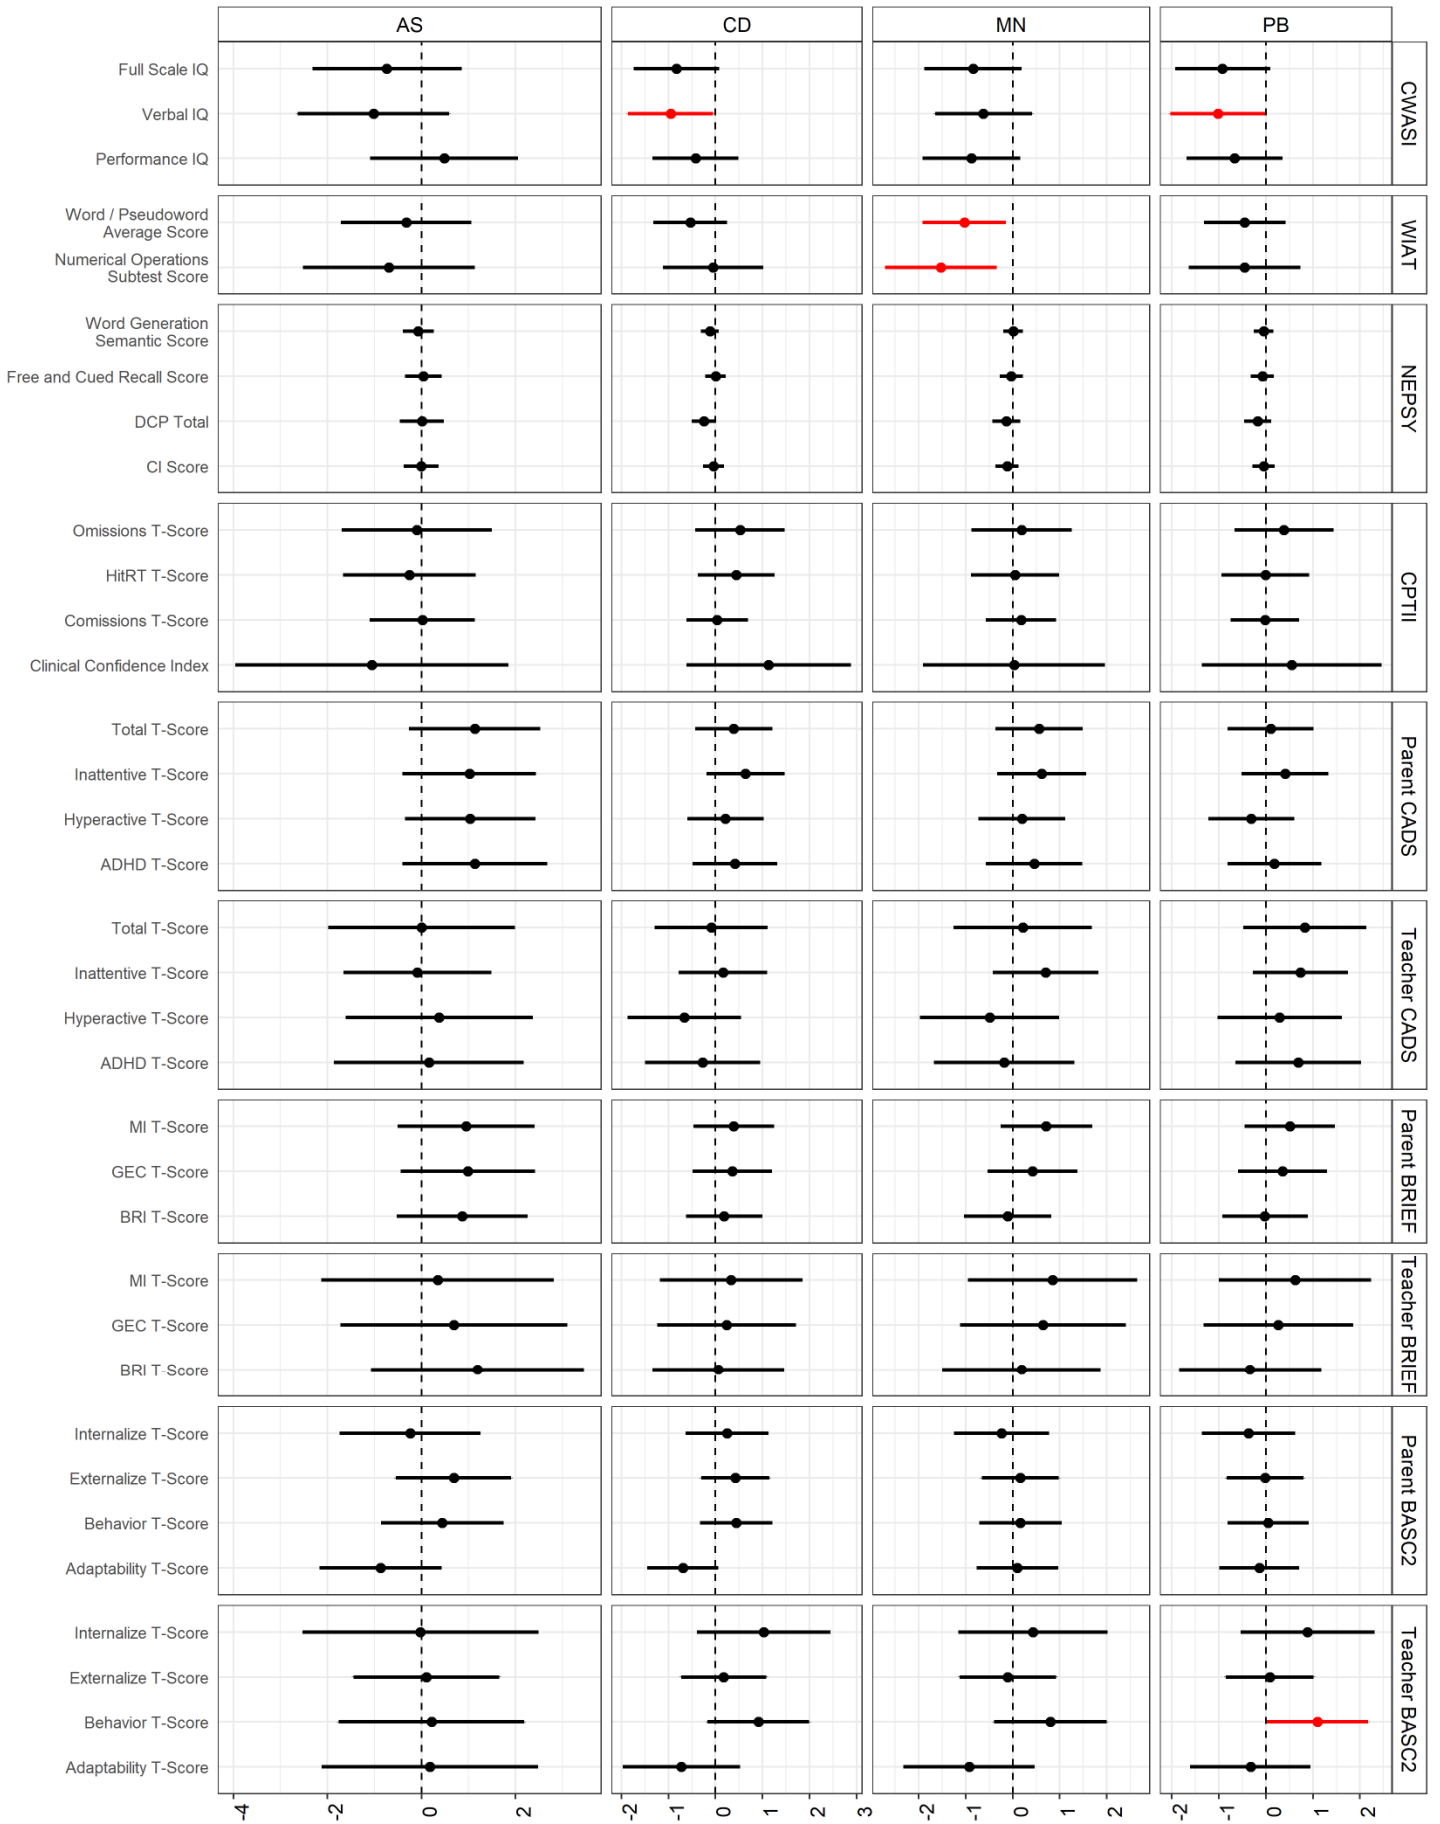

Supplement: NIHMS1930949-supplement-Supplemental_Material.pdf [file NIHMS1930949-supplement-Supplemental_Material.pdf]
